# Supplementary material for: Identification and phylogenetic analysis of RNA binding domain abundant in apicomplexans or RAP proteins
Source: PubMed Central journal article supplement (PMC8190603; doi:10.1099/mgen.0.000541), 2021-03-03
Supplement: mgen-7-0541-s001.pdf [file mgen-7-0541-s001.pdf]

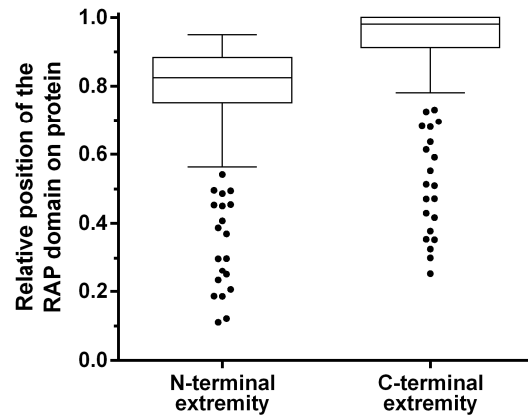

**Figure S1. Relative position of the RAP domain.** Tukey's box and whiskers show the positioning of the N-terminal and C-terminal ends of the RAP domains on their respective proteins. The relative values indicate N-terminal (0) and the C-terminal (1) of the full-length proteins. Proteins below 200 amino acids have been excluded (7/267).

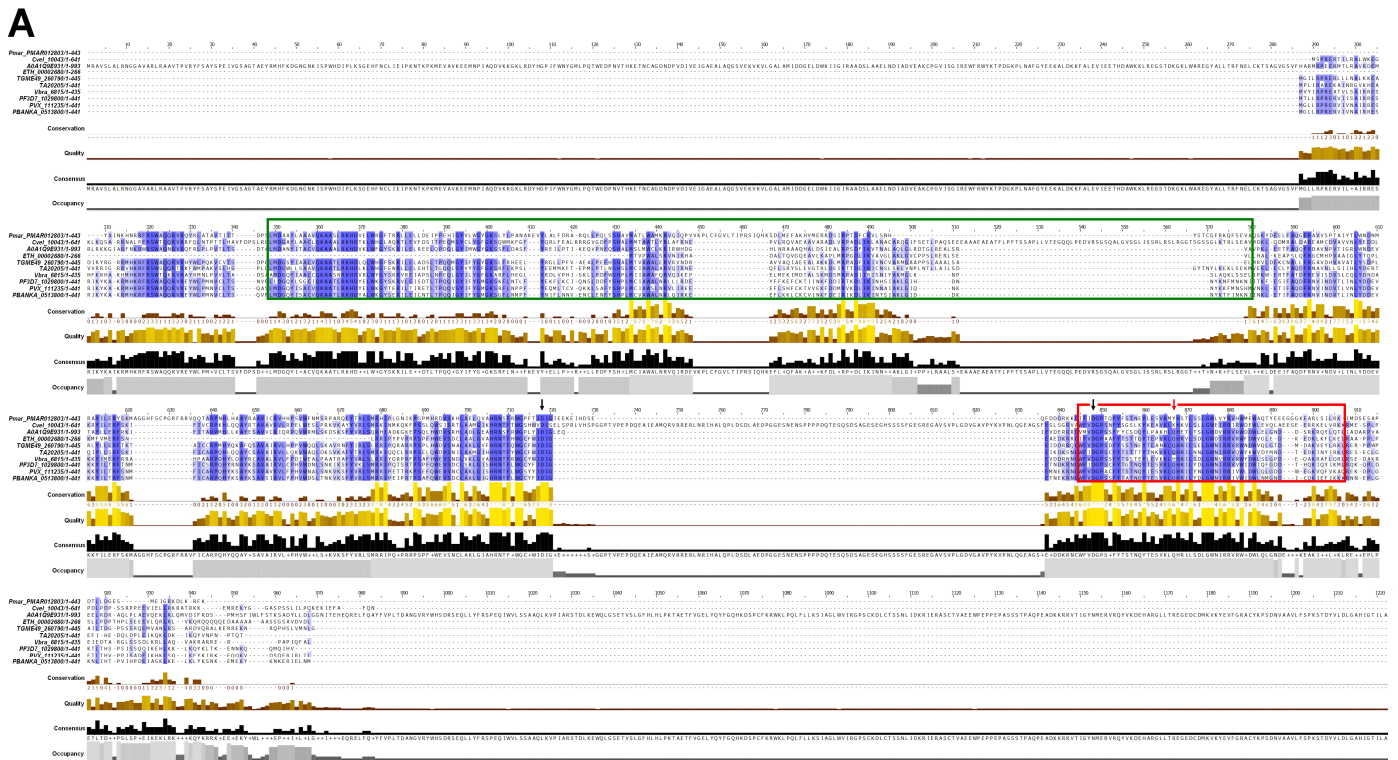

**B**

|                                         | <i>P. vivax</i><br>(PVX_111235) | <i>P. berghei</i><br>(PBANKA_0513800) | <i>T. annulata</i><br>(TA20205) | <i>T. gondii</i><br>(TGME49_260790) | <i>E. tenella</i><br>(ETH_00002680) | <i>C. velia</i><br>(Cvel_10043) | <i>V. brassicaformis</i><br>(Vbra_6815) | <i>P. marinus</i><br>(Pmar_PMAR012803) | <i>S. microadriaticum</i><br>(ADA1Q9E931) |
|-----------------------------------------|---------------------------------|---------------------------------------|---------------------------------|-------------------------------------|-------------------------------------|---------------------------------|-----------------------------------------|----------------------------------------|-------------------------------------------|
| <i>P. falciparum</i><br>(PF3D7_1029800) | 73%                             | 76%                                   | 49%                             | 48%                                 | 26%                                 | 27%                             | 47%                                     | 32%                                    | 19%                                       |

**Figure S2. Global alignment of PF3D7\_1029800 and its homologs.** A. Global alignment between PF3D7\_1029800 and its homologs from *P. vivax*, *P. berghei*, *T. annulata*, *T. gondii*, *E. tenella*, *C. velia*, *V. brassicaformis*, *P. marinus*, and *S. microadriaticum*. The positions of the peptide repeats (green box) and the RAP domain (red box) are indicated according to the respective predictions of [21] and hmmscan (Table S1). The black arrows point to the two residues of the PD-(D/E)XK endonuclease superfamily while the red arrow indicates the predicted position of the residue K, not conserved for these RAP proteins. B. Percentage of identity between PF3D7\_1029800 and its homologs in the different species.

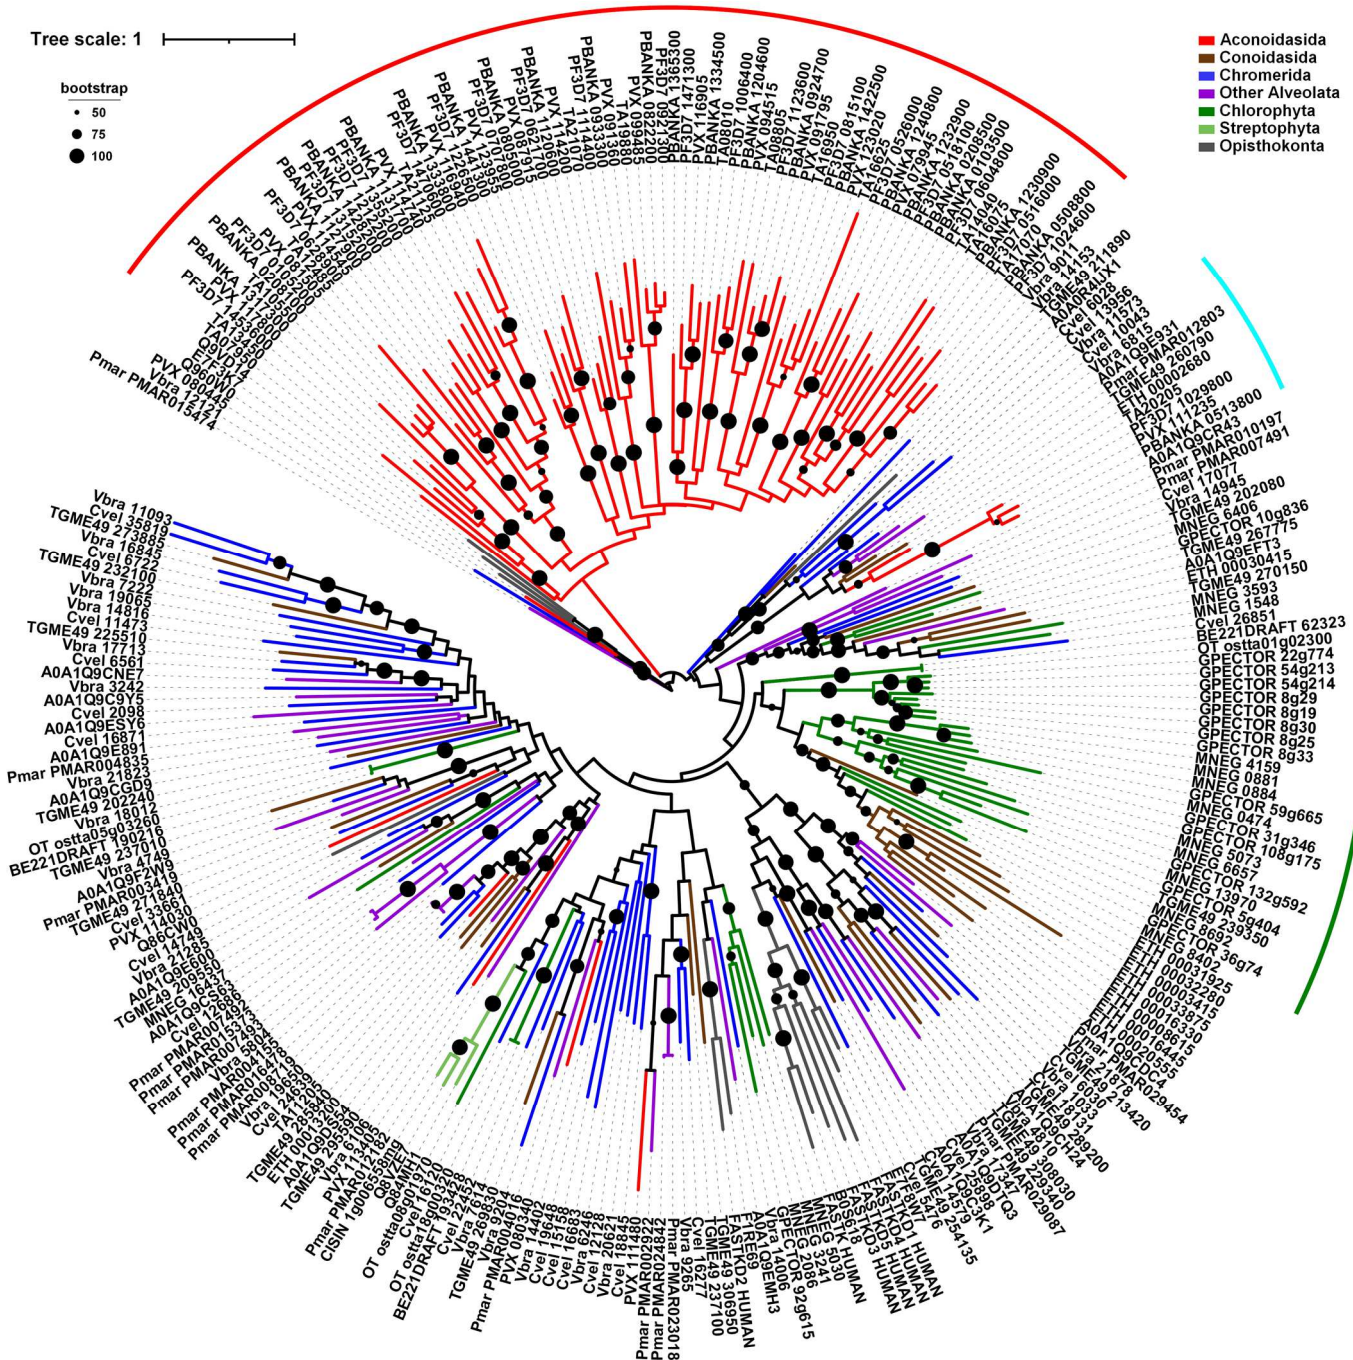

**Figure S3. Phylogenetic analysis of full-length RAP proteins in Eukaryota.** The maximum likelihood tree is built from 267 protein sequences corresponding to 19 different species. Alveolates are represented by Aconoidasida (*P. falciparum*, *P. vivax*, *P. berghei*, and *T. annulata*) in red, Conoidasida (*T. gondii* and *E. tenella*) in brown, Chromerida (*V. brassicaformis* and *C. velia*) in blue and *P. marinus* and *S. microadriaticum* in purple. Viridiplantae are represented by Chlorophyta (*G. pectorale*, *M. neglectum*, and *O. tauri*) in green and Streptophyta (*A. thaliana*, *O. sativa*, and *C. sinensis*) in pale green. Opisthokonta (*H. sapiens*, *D. rerio*, and *D. melanogaster*) are indicated in grey. Bootstrap values (> 50%) are shown on respective branches.

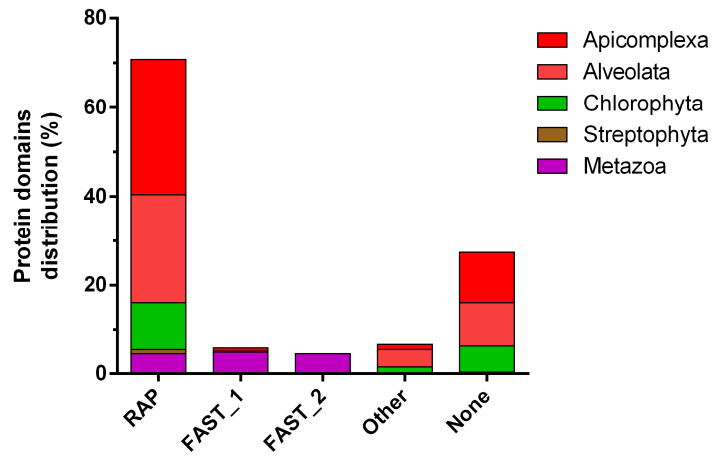

**Figure S4. Domains identified in RAP proteins by SMART.** The complete set of full-length proteins selected in this study (267 sequences) were analyzed by SMART. The results obtained for each protein are available in Table S1.

### Apicomplexa-Chromerida

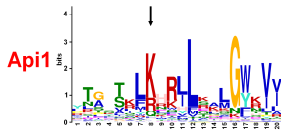

E-value: 1.5e-465  
Number of sites: 169  
Width: 20

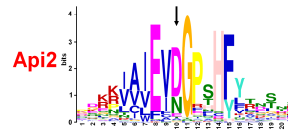

E-value: 1.2e-332  
Number of sites: 92  
Width: 21

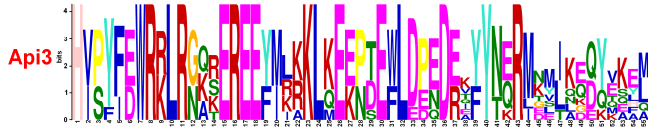

E-value: 3.1e-131  
Number of sites: 8  
Width: 55

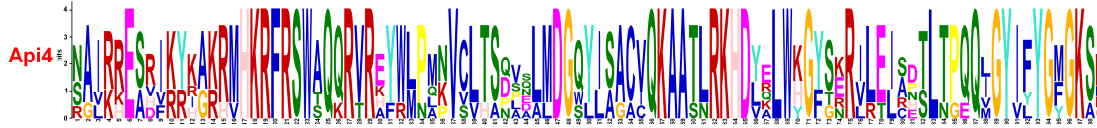

E-value: 2.1e-124  
Number of sites: 6  
Width: 99

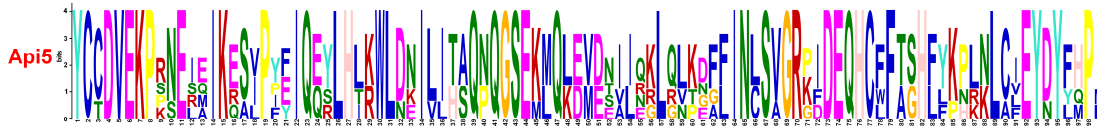

E-value: 1.2e-110  
Number of sites: 5  
Width: 100

### Chlorophyta

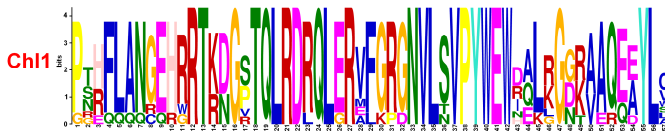

E-value: 6.0e-261  
Number of sites: 9  
Width: 57

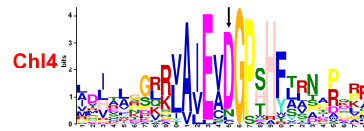

E-value: 1.0e-160  
Number of sites: 25  
Width: 28

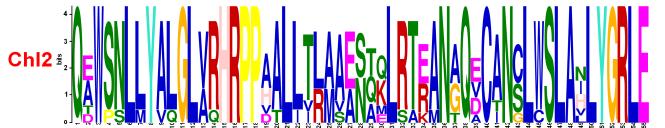

E-value: 5.1e-189  
Number of sites: 8  
Width: 55

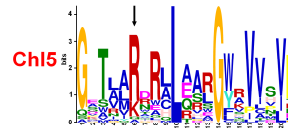

E-value: 6.6e-150  
Number of sites: 29  
Width: 22

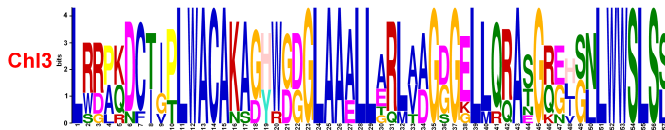

E-value: 5.1e-166  
Number of sites: 8  
Width: 57

### Metazoa

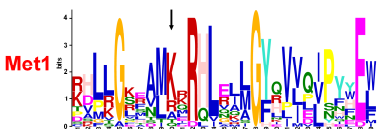

E-value: 1.5e-174  
Number of sites: 20  
Width: 29

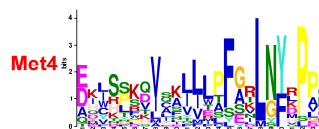

E-value: 5.4e-060  
Number of sites: 19  
Width: 24

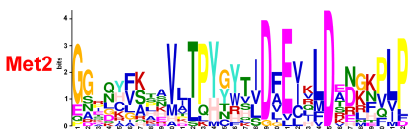

E-value: 1.2e-099  
Number of sites: 15  
Width: 32

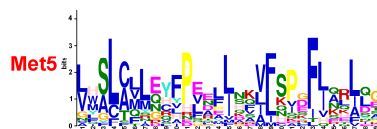

E-value: 3.1e-053  
Number of sites: 20  
Width: 29

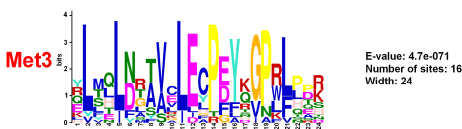

E-value: 4.7e-071  
Number of sites: 16  
Width: 24

### Randomised group

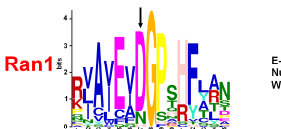

E-value: 6.8e-137  
Number of sites: 31  
Width: 15

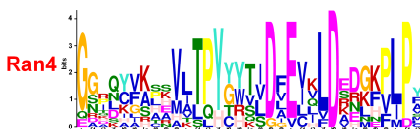

E-value: 2.0e-075  
Number of sites: 3  
Width: 33

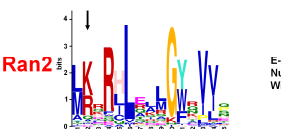

E-value: 1.7e-145  
Number of sites: 50  
Width: 15

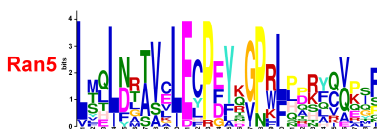

E-value: 4.9e-078  
Number of sites: 14  
Width: 29

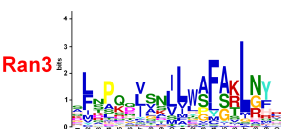

E-value: 5.3e-127  
Number of sites: 51  
Width: 21

**Figure S5. Motifs identified in RAP proteins by MEME Suite.** The sequences of RAP proteins from three groups, Apicomplexa-Chromerida, Chlorophyta and Metazoa, were analyzed by MEME Suite. An additional group was made and regrouped 20 random sequences from each previous group. The e-values, number of sites detected and the sequence width are indicated. The arrows point to the two residues of the PD-(D/E)XK endonuclease superfamily.
